# Supplementary material for: Neuropilin-1 cooperates with PD-1 in CD8+ T cells predicting outcomes in melanoma patients treated with anti-PD1
Source: PubMed Central journal article supplement — iScience. 2022 May 5;25(6):104353. doi: 10.1016/j.isci.2022.104353 (PMC9301874; doi:10.1016/j.isci.2022.104353), 2022-05-05
Supplement: mmc1.pdf [file mmc1.pdf]

## **Supplemental information**

### **Neuropilin-1 cooperates with PD-1 in CD8<sup>+</sup> T cells predicting outcomes in melanoma patients treated with anti-PD1**

**Julien Rossignol, Zakia Belaid, Guillemette Fouquet, Flavia Guillem, Rachel Rignault, Pierre Milpied, Amédée Renand, Tereza Coman, Maud D'Aveni, Michael Dussiot, Elia Colin, Jonathan Levy, Caroline Carvalho, Nicolas Goudin, Nicolas Cagnard, Francine Côté, Joel Babdor, Kanit Bhukhai, Laura Polivka, Amélie E. Bigorgne, Héloïse Halse, Aurélien Marabelle, Séverine Mouraud, Yves Lepelletier, Thiago T. Maciel, Marie-Thérèse Rubio, Delphine Heron, Caroline Robert, Isabelle Girault, Doris Lebeherec, Jean-Yves Scoazec, Ivan Moura, Louise Condon, Mirjana Weimershaus, Franck Pages, Jean Davoust, David Gross, and Olivier Hermine**

Figure S1

a

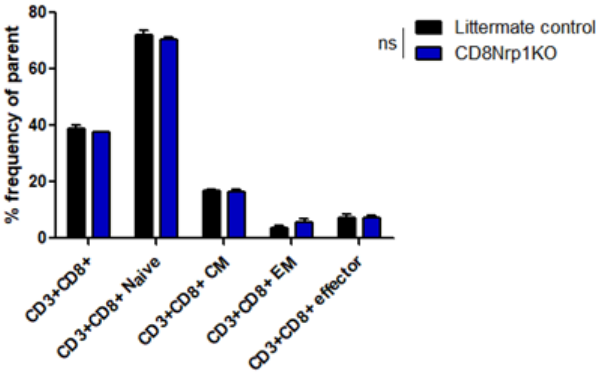

b

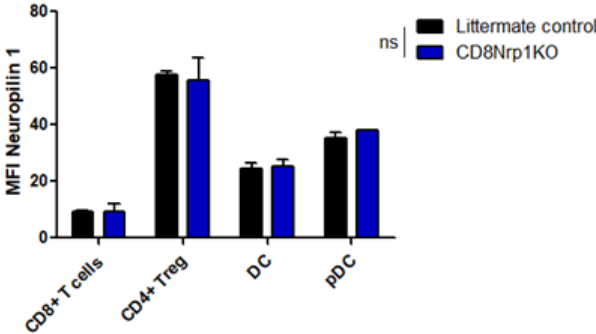

Figure S2

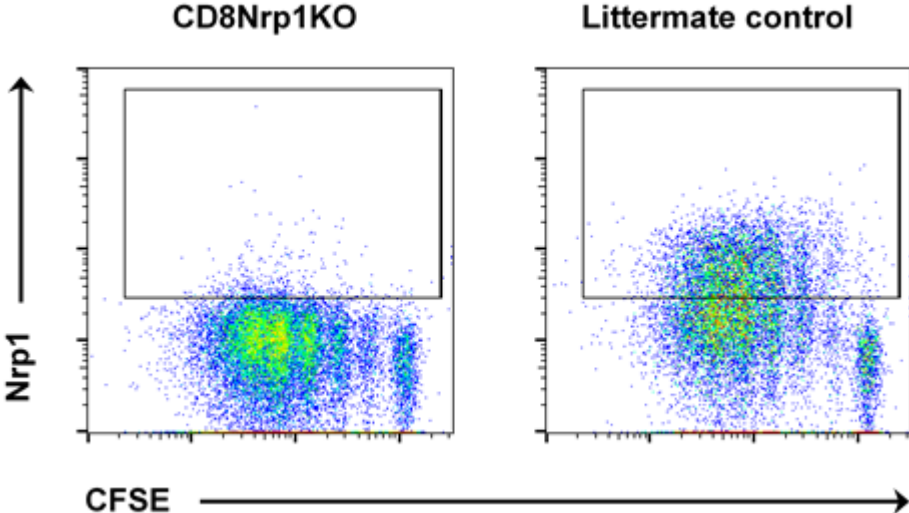

Figure S3

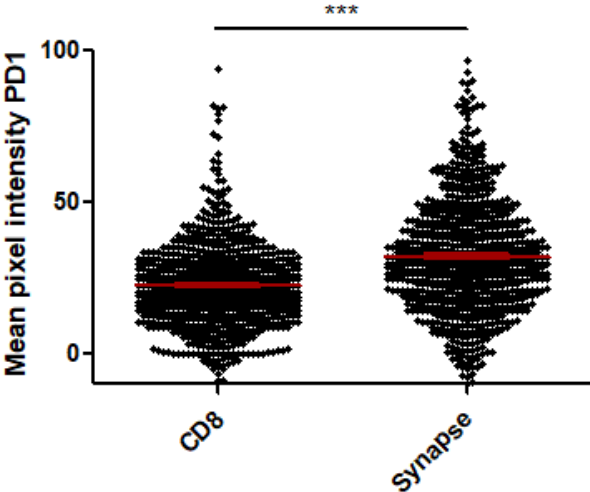

Figure S4

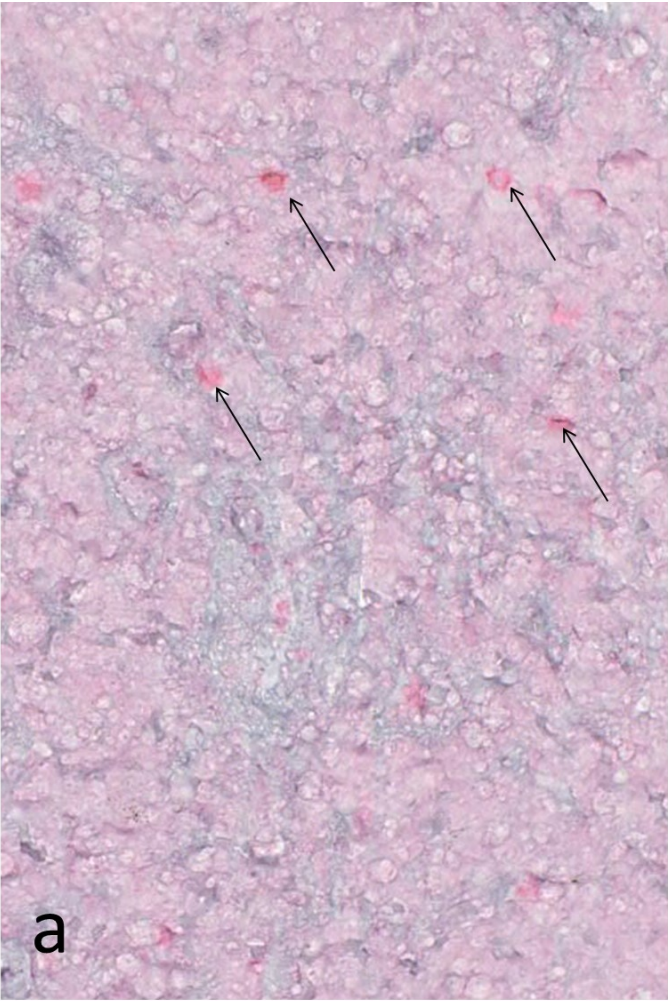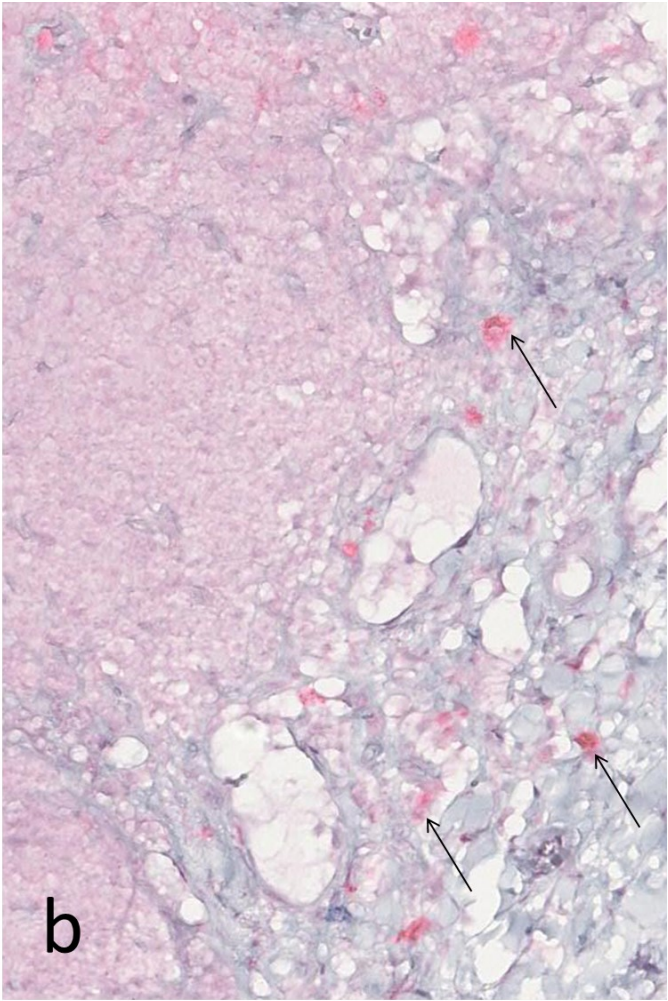

Figure S5

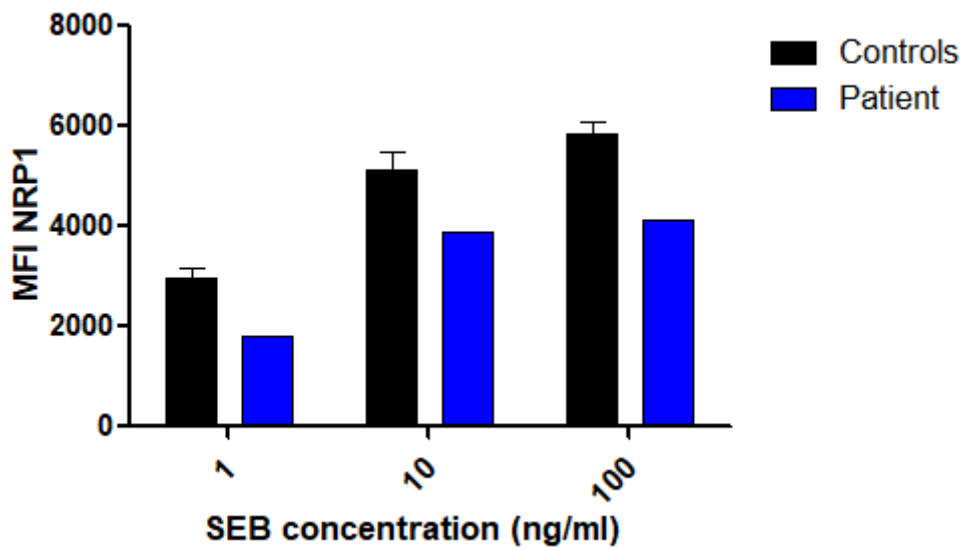

**Supplementary Materials (Figures)**

**Figure S1.** [Spleen T-cells subsets in CD8Nrp1KO (KO) and littermate (WT) mice] Related to Figure 1.

**Figure S2.** [Expression of NRP1 on activated spleen CD8<sup>+</sup> T-cells from CD8Nrp1KO (KO) and littermate (WT) mice] Related to Figure 1.

**Figure S3.** [PD1 is recruited within the synapse between CD8<sup>+</sup> T-cells and tumor cells] Related to Figure 2.

**Figure S4.** [NRP1 expression in Tumor infiltrating CD8<sup>+</sup> T-cells among human melanoma tumor] Related to Figure 3.

**Figure S5.** [NRP1 expression in activated CD8<sup>+</sup> T-cells from one patient bearing a *NRP1* haploinsufficiency and from controls] Related to Figure 3.

**Figure S1. Frequency of spleen CD8<sup>+</sup> T-cells subsets and NRP1 expression in spleen immune cells from CD8Nrp1KO and littermate controls mice.**

(a) Flow cytometry analysis of the subset composition (CM=central memory, EM=effector memory) of steady state spleen CD8<sup>+</sup> T-cells from CD8Nrp1KO and littermate controls mice. Data are expressed in percentage of cells and presented as mean  $\pm$  SEM. P values were determined by student T test, NS: non significant (n=3). (b) Flow cytometry analysis of NRP1 expression on spleen immune cells (Treg=Regulatory T-cells, DC=Dendritic Cells, pDC= plasmacytoid Dendritic Cells) from CD8Nrp1KO and littermate controls mice. Data are expressed in mean fluorescence intensity and presented as mean  $\pm$  SEM. P values were determined by student T test, NS: non significant. Data are representative of 2 mice per group.

**Figure S2. Expression of NRP1 on activated spleen CD8<sup>+</sup> T-cells from CD8Nrp1KO (KO) and littermate (WT) mice.**

Flow cytometry analysis of NRP1 expression according to cell tracer intensity, on spleen CD8<sup>+</sup> T-cells from KO and WT mice, activated *in vitro* with coated anti-CD3 (5 $\mu$ g/ml) and soluble anti-CD28 antibodies (5 $\mu$ g/ml) for 72h. Data are representative of >10 experiments.

**Figure S3. PD1 is recruited within the synapse between activated CD8<sup>+</sup> T-cells and tumor cells.**

Analysis by Imagestream of PD1 expression (mean pixel intensity/MPI) in a synapse model between activated CD8<sup>+</sup> T-cells and allogeneic A20 tumor cells: PD1 expression was analysed in phalloidine high area between activated CD8<sup>+</sup> T-cells and tumor cells (A20). Data are presented as mean MPI  $\pm$  SEM. P value was determined by student T test \*\*\*p<0.001. Data are representative of 5 experiments.

**Figure S4. NRP1 expression in Tumor infiltrating CD8<sup>+</sup> T-cells among human melanoma tumor.**

Immuno-alkaline phosphatase labeling of scattered NRP1<sup>+</sup>CD8<sup>+</sup> T-cells (a) among melanoma tumor cells and (b) at the periphery of tumor masses, in the adjacent stroma. Arrows indicate NRP1<sup>+</sup>CD8<sup>+</sup> T-cells. Original magnifications: x450. Data are representative of N=25 patients.

**Figure S5. NRP1 expression in activated CD8<sup>+</sup> T-cells from one patient bearing a NRP1 haploinsufficiency and from controls.**

Flow cytometry analysis of NRP1 expression (mean fluorescence intensity/MFI) on CD8<sup>+</sup> T-cells from one patient bearing a NRP1 haploinsufficiency (Patient) or from 5 controls, respective to SEB superantigen concentration (1, 10 or 100 ng/mL). Activation was performed with SEB superantigen during 72 hours. Data are presented as mean MFI  $\pm$  SEM. Data are representative of 1 experiment with 5 different controls.
